# Supplementary material
Source: PubMed Central journal article supplement (PMC153647)

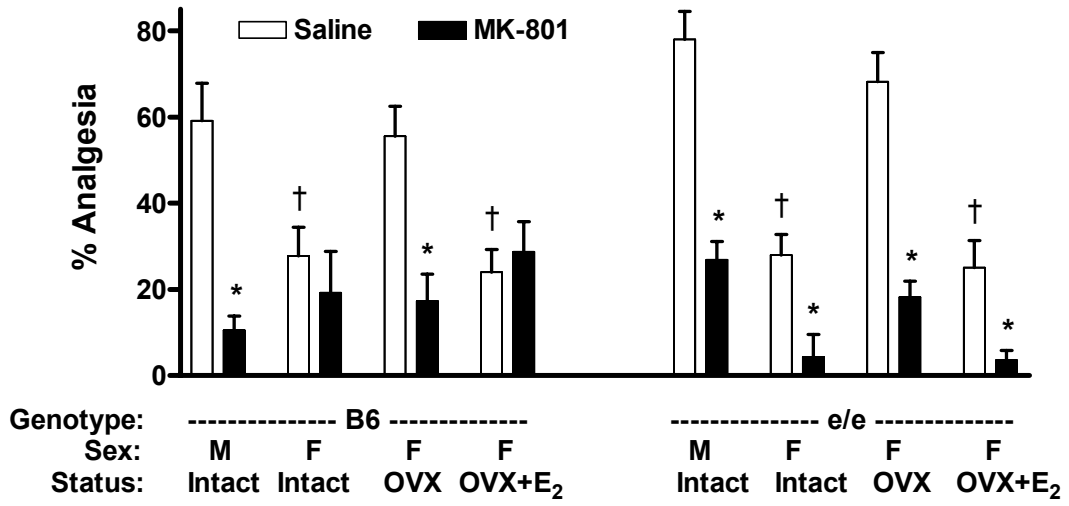

Supplement: pnas_0730053100_3.pdf [file pnas_0730053100_3.pdf]
